# Supplementary material
Source: PubMed Central journal article supplement (PMC3171574)
Supplement: NIHMS315986-supplement-1_si_001.pdf [file NIHMS315986-supplement-1_si_001.pdf]

Contribution from The Department of Chemistry and Biochemistry,  
University of Notre Dame, Notre Dame, Indiana 46556,  
and The Department of Physics, Knox College, Galesburg, Illinois 61401

## Metalloporphyrin Mixed-Valence $\pi$ -Cation Radicals: $[\text{Fe}(\text{oxoOEC}^{\bullet/2})(\text{Cl})]_2\text{SbCl}_6$ , Structure, Magnetic Properties, and Near-IR Spectra

Ming Li,<sup>1</sup> Teresa J. Neal,<sup>†</sup> Graeme R. A. Wyllie,<sup>†</sup> Allen G. Oliver,<sup>†</sup> Charles E. Schulz,<sup>2,\*</sup> and  
W. Robert Scheidt<sup>†,1</sup>

July 10, 2011

---

<sup>1</sup>The University of Notre Dame

<sup>2</sup>Knox College

<sup>†</sup>To whom correspondence should be addressed

**Table S1.** Complete Crystallographic Details for  $[\text{Fe}(\text{oxoOEC}^{*/2})(\text{Cl})]_2\text{SbCl}_6$ 

|                                           |                                                                      |
|-------------------------------------------|----------------------------------------------------------------------|
| formula                                   | $\text{C}_{37}\text{H}_{46}\text{Cl}_6\text{FeN}_4\text{OSb}_{0.50}$ |
| FW, amu                                   | 892.20                                                               |
| $a$ , Å                                   | 10.333(2)                                                            |
| $b$ , Å                                   | 12.555(3)                                                            |
| $c$ , Å                                   | 15.849(3)                                                            |
| $\alpha$ , deg                            | 83.64(3)                                                             |
| $\beta$ , deg                             | 77.53(3)                                                             |
| $\gamma$ , deg                            | 87.19(3)                                                             |
| $V$ , Å <sup>3</sup>                      | 1994.6(7)                                                            |
| space group                               | $P\bar{1}$                                                           |
| $Z$                                       | 2                                                                    |
| $D_c$ , g/cm <sup>3</sup>                 | 1.486                                                                |
| F(000)                                    | 915                                                                  |
| $\mu$ , mm <sup>-1</sup>                  | 1.146                                                                |
| crystal dimensions, mm                    | $0.2 \times 0.15 \times 0.02$                                        |
| radiation                                 | MoK $\alpha$ , $\bar{\lambda} = 0.71073$ Å                           |
| temperature, K                            | 127(2)                                                               |
| diffractometer                            | Enraf-Nonius Fast Area Detector                                      |
| $\theta$ range for collected data, deg    | 2.20–25.50                                                           |
| index range                               | $-12 \leq h \leq 12$<br>$-10 \leq k \leq 15$<br>$-19 \leq l \leq 19$ |
| total data collected                      | 14683                                                                |
| absorption correction                     | Empirical (DIFFABS)                                                  |
| relative transmission coefficients (I)    | 1.0 and 0.3477                                                       |
| unique data                               | 7319 ( $R_{\text{int}} = 0.1391$ )                                   |
| unique observed data [ $I > 2\sigma(I)$ ] | 4843                                                                 |
| refinement method                         | Full-matrix least-squares on $F^2$                                   |
| data/restraints/parameters                | 7319/0/453                                                           |
| goodness-of-fit (based on $F^2$ )         | 1.030                                                                |
| final $R$ indices [ $I > 2\sigma(I)$ ]    | $R_1 = 0.0983$ , $wR_2 = 0.2397$                                     |
| final $R$ indices (all data)              | $R_1 = 0.1633$ , $wR_2 = 0.2935$                                     |

**Table S2.** Atomic Coordinates and Equivalent Isotropic Displacement Parameters ( $\text{\AA}^2$ ) for  $[\text{Fe}(\text{oxoOEC}^{*/2})(\text{Cl})]_2\text{SbCl}_6^a$

| atom  | $x$         | $y$         | $z$         | $U(\text{eq})$ |
|-------|-------------|-------------|-------------|----------------|
| Fe(1) | 0.86665(13) | 0.20352(11) | 0.07576(9)  | 0.0401(4)      |
| Cl(1) | 0.6892(2)   | 0.3098(2)   | 0.07664(17) | 0.0484(6)      |
| O(1)  | 0.5883(8)   | -0.0728(6)  | 0.3321(5)   | 0.058(2)       |
| N(1)  | 0.9778(8)   | 0.2896(6)   | 0.1358(5)   | 0.0379(17)     |
| N(2)  | 0.8062(8)   | 0.1111(6)   | 0.1975(5)   | 0.0377(17)     |
| N(3)  | 0.8331(8)   | 0.0686(6)   | 0.0191(5)   | 0.0407(18)     |
| N(4)  | 0.9945(7)   | 0.2511(6)   | -0.0386(5)  | 0.0393(18)     |
| C(a1) | 1.0615(9)   | 0.3705(8)   | 0.0996(6)   | 0.043(2)       |
| C(a2) | 0.9688(11)  | 0.2905(8)   | 0.2245(7)   | 0.048(2)       |
| C(a3) | 0.8110(9)   | 0.1408(8)   | 0.2744(6)   | 0.041(2)       |
| C(a4) | 0.7281(10)  | 0.0203(9)   | 0.2080(7)   | 0.049(3)       |
| C(a5) | 0.7534(10)  | -0.0170(8)  | 0.0582(7)   | 0.045(2)       |
| C(a6) | 0.8606(9)   | 0.0580(8)   | -0.0685(7)  | 0.045(2)       |
| C(a7) | 1.0015(10)  | 0.2163(9)   | -0.1187(6)  | 0.044(2)       |
| C(a8) | 1.0713(10)  | 0.3405(9)   | -0.0546(7)  | 0.049(3)       |
| C(b1) | 1.1084(10)  | 0.4226(8)   | 0.1634(7)   | 0.044(2)       |
| C(b2) | 1.0506(9)   | 0.3702(7)   | 0.2425(6)   | 0.039(2)       |
| C(b3) | 0.7321(11)  | 0.0730(8)   | 0.3506(6)   | 0.045(2)       |
| C(b4) | 0.6698(10)  | -0.0034(9)  | 0.3023(7)   | 0.049(2)       |
| C(b5) | 0.7344(11)  | -0.0836(9)  | -0.0089(7)  | 0.050(2)       |
| C(b6) | 0.7991(10)  | -0.0383(9)  | -0.0846(7)  | 0.048(2)       |
| C(b7) | 1.0856(10)  | 0.2823(9)   | -0.1864(6)  | 0.045(2)       |
| C(b8) | 1.1264(10)  | 0.3635(8)   | -0.1464(7)  | 0.047(2)       |
| C(m1) | 0.8850(10)  | 0.2245(8)   | 0.2883(6)   | 0.043(2)       |
| C(m2) | 0.7048(9)   | -0.0355(8)  | 0.1468(6)   | 0.042(2)       |
| C(m3) | 0.9388(11)  | 0.1258(8)   | -0.1308(7)  | 0.047(2)       |
| C(m4) | 1.1010(9)   | 0.3957(9)   | 0.0097(6)   | 0.044(2)       |
| C(11) | 1.2064(10)  | 0.5099(9)   | 0.1442(7)   | 0.052(3)       |
| C(12) | 1.3483(8)   | 0.4684(9)   | 0.1153(6)   | 0.068(3)       |
| C(21) | 1.0755(8)   | 0.3840(7)   | 0.3290(6)   | 0.048(2)       |
| C(22) | 1.1633(13)  | 0.2934(10)  | 0.3622(8)   | 0.066(3)       |
| C(31) | 0.8251(12)  | 0.0080(10)  | 0.4032(7)   | 0.055(3)       |
| C(32) | 0.7588(13)  | -0.0709(11) | 0.4782(9)   | 0.072(4)       |
| C(41) | 0.6211(12)  | 0.1351(9)   | 0.4056(7)   | 0.057(3)       |

**Table S2.** Continued

| atom   | <i>x</i>   | <i>y</i>    | <i>z</i>   | <i>U</i> (eq) |
|--------|------------|-------------|------------|---------------|
| C(42)  | 0.5294(12) | 0.1997(10)  | 0.3521(9)  | 0.064(3)      |
| C(51)  | 0.6524(10) | -0.1808(8)  | 0.0125(8)  | 0.050(2)      |
| C(52)  | 0.5029(11) | -0.1581(9)  | 0.0325(8)  | 0.058(3)      |
| C(61)  | 0.8036(11) | -0.0758(10) | -0.1728(7) | 0.055(3)      |
| C(62)  | 0.6774(14) | -0.0556(11) | -0.2070(9) | 0.068(3)      |
| C(71)  | 1.1222(12) | 0.2630(11)  | -0.2813(8) | 0.066(3)      |
| C(72)  | 1.0563(13) | 0.3420(10)  | -0.3386(8) | 0.063(3)      |
| C(81)  | 1.2214(11) | 0.4514(10)  | -0.1870(8) | 0.058(3)      |
| C(82)  | 1.3643(12) | 0.4244(11)  | -0.1839(9) | 0.068(4)      |
| Sb     | 0.5000     | 0.5000      | 0.5000     | 0.0527(3)     |
| Cl(3)  | 0.6928(3)  | 0.4197(2)   | 0.4183(2)  | 0.0638(8)     |
| Cl(4)  | 0.5744(3)  | 0.6719(2)   | 0.4373(2)  | 0.0591(7)     |
| Cl(5)  | 0.3881(3)  | 0.4909(3)   | 0.3859(2)  | 0.0681(8)     |
| C(1)   | 0.6982(12) | 0.2185(10)  | 0.6281(11) | 0.076(4)      |
| Cl(11) | 0.6832(4)  | 0.2511(3)   | 0.7448(2)  | 0.0773(9)     |
| Cl(12) | 0.8478(4)  | 0.1387(4)   | 0.6066(3)  | 0.0886(12)    |

<sup>a</sup>*U*(eq) is defined as one third of the trace of the orthogonalized  $\mathbf{U}_{ij}$  tensor. The estimated standard deviations of the least significant digits are given in parentheses.

**Table S3.** Bond Lengths for  $[\text{Fe}(\text{oxoOEC}^{\bullet/2})(\text{Cl})]_2\text{SbCl}_6^a$ 

| bond        | length (Å) | bond        | length (Å) |
|-------------|------------|-------------|------------|
| Fe(1)–N(4)  | 2.047(8)   | Sb–Cl(4)#1  | 2.364(3)   |
| Fe(1)–N(1)  | 2.053(8)   | Sb–Cl(3)#1  | 2.375(3)   |
| Fe(1)–N(3)  | 2.080(8)   | Sb–Cl(3)    | 2.375(3)   |
| Fe(1)–N(2)  | 2.124(8)   | C(1)–Cl(12) | 1.790(12)  |
| Fe(1)–Cl(1) | 2.213(3)   | C(1)–Cl(11) | 1.911(16)  |
| O(1)–C(b4)  | 1.225(12)  | C(m1)–H(m1) | 0.9500     |
| N(1)–C(a1)  | 1.360(12)  | C(m2)–H(m2) | 0.9500     |
| N(1)–C(a2)  | 1.390(13)  | C(m3)–H(m3) | 0.9500     |
| N(2)–C(a3)  | 1.325(13)  | C(m4)–H(m4) | 0.9500     |
| N(2)–C(a4)  | 1.403(13)  | C(11)–H(1a) | 0.9900     |
| N(3)–C(a6)  | 1.376(13)  | C(11)–H(1b) | 0.9900     |
| N(3)–C(a5)  | 1.392(12)  | C(12)–H(1c) | 0.9800     |
| N(4)–C(a8)  | 1.375(13)  | C(12)–H(1d) | 0.9800     |
| N(4)–C(a7)  | 1.376(12)  | C(12)–H(1e) | 0.9800     |
| C(a1)–C(m4) | 1.399(13)  | C(21)–H(2a) | 0.9900     |
| C(a1)–C(b1) | 1.439(14)  | C(21)–H(2b) | 0.9900     |
| C(a2)–C(m1) | 1.401(14)  | C(22)–H(2c) | 0.9800     |
| C(a2)–C(b2) | 1.432(14)  | C(22)–H(2d) | 0.9800     |
| C(a3)–C(m1) | 1.393(14)  | C(22)–H(2e) | 0.9800     |
| C(a3)–C(b3) | 1.505(13)  | C(31)–H(3a) | 0.9900     |
| C(a4)–C(m2) | 1.326(15)  | C(31)–H(3b) | 0.9900     |
| C(a4)–C(b4) | 1.490(15)  | C(32)–H(3c) | 0.9800     |
| C(a5)–C(m2) | 1.383(14)  | C(32)–H(3d) | 0.9800     |
| C(a5)–C(b5) | 1.473(15)  | C(32)–H(3e) | 0.9800     |
| C(a6)–C(m3) | 1.375(14)  | C(41)–H(4a) | 0.9900     |
| C(a6)–C(b6) | 1.463(15)  | C(41)–H(4b) | 0.9900     |
| C(a7)–C(m3) | 1.386(14)  | C(42)–H(4c) | 0.9800     |
| C(a7)–C(b7) | 1.436(13)  | C(42)–H(4d) | 0.9800     |
| C(a8)–C(m4) | 1.388(15)  | C(42)–H(4e) | 0.9800     |
| C(a8)–C(b8) | 1.446(14)  | C(51)–H(5a) | 0.9900     |
| C(b1)–C(b2) | 1.376(14)  | C(51)–H(5b) | 0.9900     |
| C(b1)–C(11) | 1.490(14)  | C(52)–H(5c) | 0.9800     |
| C(b2)–C(21) | 1.478(13)  | C(52)–H(5d) | 0.9800     |
| C(b3)–C(41) | 1.522(16)  | C(52)–H(5e) | 0.9800     |

**Table S3.** Continued

| bond        | length (Å) | bond        | length (Å) |
|-------------|------------|-------------|------------|
| C(b3)–C(b4) | 1.534(14)  | C(61)–H(6a) | 0.9900     |
| C(b3)–C(31) | 1.551(15)  | C(61)–H(6b) | 0.9900     |
| C(b5)–C(b6) | 1.323(15)  | C(62)–H(6c) | 0.9800     |
| C(b5)–C(51) | 1.485(15)  | C(62)–H(6d) | 0.9800     |
| C(b6)–C(61) | 1.515(15)  | C(62)–H(6e) | 0.9800     |
| C(b7)–C(b8) | 1.385(15)  | C(71)–H(7a) | 0.9900     |
| C(b7)–C(71) | 1.513(16)  | C(71)–H(7b) | 0.9900     |
| C(b8)–C(81) | 1.507(14)  | C(72)–H(7c) | 0.9800     |
| C(11)–C(12) | 1.523(14)  | C(72)–H(7d) | 0.9800     |
| C(21)–C(22) | 1.538(14)  | C(72)–H(7e) | 0.9800     |
| C(31)–C(32) | 1.522(15)  | C(81)–H(8a) | 0.9900     |
| C(41)–C(42) | 1.547(17)  | C(81)–H(8b) | 0.9900     |
| C(51)–C(52) | 1.528(15)  | C(82)–H(8c) | 0.9800     |
| C(61)–C(62) | 1.517(17)  | C(82)–H(8d) | 0.9800     |
| C(71)–C(72) | 1.507(18)  | C(82)–H(8e) | 0.9800     |
| C(81)–C(82) | 1.509(17)  | C(1)–H(1)   | 0.9900     |
| Sb–Cl(5)    | 2.363(3)   | C(1)–H(2)   | 0.9900     |
| Sb–Cl(5)#1) | 2.363(3)   |             |            |
| Sb–Cl(4)    | 2.364(3)   |             |            |

<sup>a</sup>The estimated standard deviations of the least significant digits are given in parentheses.

**Table S4.** Bond Angles for  $[\text{Fe}(\text{oxoOEC}^{\cdot/2})(\text{Cl})]_2\text{SbCl}_6^a$ 

| angle             | degree    | angle              | degree    |
|-------------------|-----------|--------------------|-----------|
| N(4)–Fe(1)–N(1)   | 87.1(3)   | Cl(4)#1–Sb–Cl(3)#1 | 90.26(10) |
| N(4)–Fe(1)–N(3)   | 87.3(3)   | Cl(5)–Sb–Cl(3)     | 90.38(12) |
| N(1)–Fe(1)–N(3)   | 152.2(3)  | Cl(5)#1–Sb–Cl(3)   | 89.62(13) |
| N(4)–Fe(1)–N(2)   | 155.4(3)  | Cl(4)–Sb–Cl(3)     | 90.26(10) |
| N(1)–Fe(1)–N(2)   | 87.0(3)   | Cl(4)#1–Sb–Cl(3)   | 89.74(10) |
| N(3)–Fe(1)–N(2)   | 86.8(3)   | Cl(3)#1–Sb–Cl(3)   | 180.0     |
| N(4)–Fe(1)–Cl(1)  | 104.9(2)  | Cl(12)–C(1)–Cl(11) | 104.1(8)  |
| N(1)–Fe(1)–Cl(1)  | 101.5(2)  | C(b1)–C(11)–H(1a)  | 109.1     |
| N(3)–Fe(1)–Cl(1)  | 106.2(2)  | C(12)–C(11)–H(1a)  | 109.1     |
| N(2)–Fe(1)–Cl(1)  | 99.7(2)   | C(b1)–C(11)–H(1b)  | 109.1     |
| C(a1)–N(1)–C(a2)  | 103.8(8)  | C(12)–C(11)–H(1b)  | 109.1     |
| C(a1)–N(1)–Fe(1)  | 128.0(6)  | H(1a)–C(11)–H(1b)  | 107.8     |
| C(a2)–N(1)–Fe(1)  | 127.5(6)  | C(11)–C(12)–H(1c)  | 109.5     |
| C(a3)–N(2)–C(a4)  | 110.1(8)  | C(11)–C(12)–H(1d)  | 109.5     |
| C(a3)–N(2)–Fe(1)  | 125.9(6)  | H(1c)–C(12)–H(1d)  | 109.5     |
| C(a4)–N(2)–Fe(1)  | 122.6(6)  | C(11)–C(12)–H(1e)  | 109.5     |
| C(a6)–N(3)–C(a5)  | 105.7(8)  | H(1c)–C(12)–H(1e)  | 109.5     |
| C(a6)–N(3)–Fe(1)  | 125.9(6)  | H(1d)–C(12)–H(1e)  | 109.5     |
| C(a5)–N(3)–Fe(1)  | 126.9(7)  | C(b2)–C(21)–H(2a)  | 109.0     |
| C(a8)–N(4)–C(a7)  | 105.0(8)  | C(22)–C(21)–H(2a)  | 109.0     |
| C(a8)–N(4)–Fe(1)  | 125.9(7)  | C(b2)–C(21)–H(2b)  | 109.0     |
| C(a7)–N(4)–Fe(1)  | 127.8(6)  | C(22)–C(21)–H(2b)  | 109.0     |
| N(1)–C(a1)–C(m4)  | 122.7(9)  | H(2a)–C(21)–H(2b)  | 107.8     |
| N(1)–C(a1)–C(b1)  | 112.7(9)  | C(21)–C(22)–H(2c)  | 109.5     |
| C(m4)–C(a1)–C(b1) | 124.5(9)  | C(21)–C(22)–H(2d)  | 109.5     |
| N(1)–C(a2)–C(m1)  | 123.9(9)  | H(2c)–C(22)–H(2d)  | 109.5     |
| N(1)–C(a2)–C(b2)  | 111.7(9)  | C(21)–C(22)–H(2e)  | 109.5     |
| C(m1)–C(a2)–C(b2) | 124.4(10) | H(2c)–C(22)–H(2e)  | 109.5     |
| N(2)–C(a3)–C(m1)  | 125.4(9)  | H(2d)–C(22)–H(2e)  | 109.5     |
| N(2)–C(a3)–C(b3)  | 114.6(9)  | C(32)–C(31)–H(3a)  | 108.2     |
| C(m1)–C(a3)–C(b3) | 119.9(9)  | C(b3)–C(31)–H(3a)  | 108.2     |
| C(m2)–C(a4)–N(2)  | 127.9(9)  | C(32)–C(31)–H(3b)  | 108.2     |
| C(m2)–C(a4)–C(b4) | 124.1(10) | C(b3)–C(31)–H(3b)  | 108.2     |
| N(2)–C(a4)–C(b4)  | 107.9(9)  | H(3a)–C(31)–H(3b)  | 107.4     |

**Table S4.** Continued

| angle             | degree    | angle             | degree |
|-------------------|-----------|-------------------|--------|
| C(m2)–C(a5)–N(3)  | 123.8(9)  | C(31)–C(32)–H(3c) | 109.5  |
| C(m2)–C(a5)–C(b5) | 126.9(9)  | C(31)–C(32)–H(3d) | 109.5  |
| N(3)–C(a5)–C(b5)  | 109.3(9)  | H(3c)–C(32)–H(3d) | 109.5  |
| C(m3)–C(a6)–N(3)  | 124.6(9)  | C(31)–C(32)–H(3e) | 109.5  |
| C(m3)–C(a6)–C(b6) | 125.4(10) | H(3c)–C(32)–H(3e) | 109.5  |
| N(3)–C(a6)–C(b6)  | 109.9(8)  | H(3d)–C(32)–H(3e) | 109.5  |
| N(4)–C(a7)–C(m3)  | 123.3(9)  | C(b3)–C(41)–H(4a) | 108.9  |
| N(4)–C(a7)–C(b7)  | 111.6(9)  | C(42)–C(41)–H(4a) | 108.9  |
| C(m3)–C(a7)–C(b7) | 125.0(9)  | C(b3)–C(41)–H(4b) | 108.9  |
| N(4)–C(a8)–C(m4)  | 124.2(9)  | C(42)–C(41)–H(4b) | 108.9  |
| N(4)–C(a8)–C(b8)  | 111.2(9)  | H(4a)–C(41)–H(4b) | 107.7  |
| C(m4)–C(a8)–C(b8) | 124.4(10) | C(41)–C(42)–H(4c) | 109.5  |
| C(b2)–C(b1)–C(a1) | 105.6(9)  | C(41)–C(42)–H(4d) | 109.5  |
| C(b2)–C(b1)–C(11) | 128.7(9)  | H(4c)–C(42)–H(4d) | 109.5  |
| C(a1)–C(b1)–C(11) | 125.6(9)  | C(41)–C(42)–H(4e) | 109.5  |
| C(b1)–C(b2)–C(a2) | 106.2(9)  | H(4c)–C(42)–H(4e) | 109.5  |
| C(b1)–C(b2)–C(21) | 128.2(9)  | H(4d)–C(42)–H(4e) | 109.5  |
| C(a2)–C(b2)–C(21) | 125.4(9)  | C(b5)–C(51)–H(5a) | 108.6  |
| C(a3)–C(b3)–C(41) | 113.4(9)  | C(52)–C(51)–H(5a) | 108.6  |
| C(a3)–C(b3)–C(b4) | 99.8(8)   | C(b5)–C(51)–H(5b) | 108.6  |
| C(41)–C(b3)–C(b4) | 108.5(9)  | C(52)–C(51)–H(5b) | 108.6  |
| C(a3)–C(b3)–C(31) | 110.8(9)  | H(5a)–C(51)–H(5b) | 107.6  |
| C(41)–C(b3)–C(31) | 114.0(9)  | C(51)–C(52)–H(5c) | 109.5  |
| C(b4)–C(b3)–C(31) | 109.4(9)  | C(51)–C(52)–H(5d) | 109.5  |
| O(1)–C(b4)–C(a4)  | 123.9(10) | H(5c)–C(52)–H(5d) | 109.5  |
| O(1)–C(b4)–C(b3)  | 129.0(10) | C(51)–C(52)–H(5e) | 109.5  |
| C(a4)–C(b4)–C(b3) | 107.2(9)  | H(5c)–C(52)–H(5e) | 109.5  |
| C(b6)–C(b5)–C(a5) | 107.2(10) | H(5d)–C(52)–H(5e) | 109.5  |
| C(b6)–C(b5)–C(51) | 130.6(10) | C(b6)–C(61)–H(6a) | 108.4  |
| C(a5)–C(b5)–C(51) | 122.2(10) | C(62)–C(61)–H(6a) | 108.4  |
| C(b5)–C(b6)–C(a6) | 107.8(10) | C(b6)–C(61)–H(6b) | 108.4  |
| C(b5)–C(b6)–C(61) | 126.3(10) | C(62)–C(61)–H(6b) | 108.4  |
| C(a6)–C(b6)–C(61) | 125.8(9)  | H(6a)–C(61)–H(6b) | 107.5  |
| C(b8)–C(b7)–C(a7) | 106.1(9)  | C(61)–C(62)–H(6c) | 109.5  |

**Table S4.** Continued

| angle              | degree    | angle             | degree |
|--------------------|-----------|-------------------|--------|
| C(b8)–C(b7)–C(71)  | 128.3(9)  | C(61)–C(62)–H(6d) | 109.5  |
| C(a7)–C(b7)–C(71)  | 125.7(9)  | H(6c)–C(62)–H(6d) | 109.5  |
| C(b7)–C(b8)–C(a8)  | 106.0(9)  | C(61)–C(62)–H(6e) | 109.5  |
| C(b7)–C(b8)–C(81)  | 127.9(10) | H(6c)–C(62)–H(6e) | 109.5  |
| C(a8)–C(b8)–C(81)  | 125.7(10) | H(6d)–C(62)–H(6e) | 109.5  |
| C(a3)–C(m1)–C(a2)  | 126.5(10) | C(72)–C(71)–H(7a) | 108.9  |
| C(a4)–C(m2)–C(a5)  | 127.2(10) | C(b7)–C(71)–H(7a) | 108.9  |
| C(a6)–C(m3)–C(a7)  | 127.6(10) | C(72)–C(71)–H(7b) | 108.9  |
| C(a8)–C(m4)–C(a1)  | 126.9(9)  | C(b7)–C(71)–H(7b) | 108.9  |
| C(b1)–C(11)–C(12)  | 112.6(10) | H(7a)–C(71)–H(7b) | 107.7  |
| C(b2)–C(21)–C(22)  | 113.0(8)  | C(71)–C(72)–H(7c) | 109.5  |
| C(32)–C(31)–C(b3)  | 116.3(10) | C(71)–C(72)–H(7d) | 109.5  |
| C(a3)–C(m1)–H(m1)  | 116.7     | H(7c)–C(72)–H(7d) | 109.5  |
| C(a2)–C(m1)–H(m1)  | 116.7     | C(71)–C(72)–H(7e) | 109.5  |
| C(a4)–C(m2)–H(m2)  | 116.4     | H(7c)–C(72)–H(7e) | 109.5  |
| C(a5)–C(m2)–H(m2)  | 116.4     | H(7d)–C(72)–H(7e) | 109.5  |
| C(a6)–C(m3)–H(m3)  | 116.2     | C(b8)–C(81)–H(8a) | 108.6  |
| C(a7)–C(m3)–H(m3)  | 116.2     | C(82)–C(81)–H(8a) | 108.6  |
| C(a8)–C(m4)–H(m4)  | 116.5     | C(b8)–C(81)–H(8b) | 108.6  |
| C(a1)–C(m4)–H(m4)  | 116.5     | C(82)–C(81)–H(8b) | 108.6  |
| C(b3)–C(41)–C(42)  | 113.3(10) | H(8a)–C(81)–H(8b) | 107.6  |
| C(b5)–C(51)–C(52)  | 114.6(9)  | C(81)–C(82)–H(8c) | 109.5  |
| C(b6)–C(61)–C(62)  | 115.4(10) | C(81)–C(82)–H(8d) | 109.5  |
| C(72)–C(71)–C(b7)  | 113.3(11) | H(8c)–C(82)–H(8d) | 109.5  |
| C(b8)–C(81)–C(82)  | 114.5(10) | C(81)–C(82)–H(8e) | 109.5  |
| Cl(5)–Sb–Cl(5)#1   | 180.0     | H(8c)–C(82)–H(8e) | 109.5  |
| Cl(5)–Sb–Cl(4)     | 89.36(11) | H(8d)–C(82)–H(8e) | 109.5  |
| Cl(5)#1–Sb–Cl(4)   | 90.64(11) | Cl(12)–C(1)–H(1)  | 110.9  |
| Cl(5)–Sb–Cl(4)#1   | 90.64(11) | Cl(11)–C(1)–H(1)  | 110.9  |
| Cl(5)#1–Sb–Cl(4)#1 | 89.36(11) | Cl(12)–C(1)–H(2)  | 110.9  |
| Cl(4)–Sb–Cl(4)#1   | 180.0     | Cl(11)–C(1)–H(2)  | 110.9  |
| Cl(5)–Sb–Cl(3)#1   | 89.62(13) | H(1)–C(1)–H(2)    | 109.0  |
| Cl(5)#1–Sb–Cl(3)#1 | 90.38(12) |                   |        |
| Cl(4)–Sb–Cl(3)#1   | 89.74(10) |                   |        |

<sup>a</sup>The estimated standard deviations of the least significant digits are given in parentheses.

**Table S5.** Anisotropic Displacement Parameters ( $\text{\AA}^2$ ) for  $[\text{Fe}(\text{oxoOEC}^{\cdot/2})(\text{Cl})]_2\text{SbCl}_6^a$ 

| atom  | $U_{11}$   | $U_{22}$   | $U_{33}$   | $U_{23}$    | $U_{13}$    | $U_{12}$    |
|-------|------------|------------|------------|-------------|-------------|-------------|
| Fe(1) | 0.0370(7)  | 0.0464(8)  | 0.0377(8)  | 0.0022(6)   | -0.0114(5)  | -0.0073(6)  |
| Cl(1) | 0.0430(13) | 0.0515(14) | 0.0529(15) | -0.0043(11) | -0.0159(10) | -0.0001(11) |
| O(1)  | 0.065(5)   | 0.060(5)   | 0.049(4)   | 0.000(4)    | -0.011(4)   | -0.021(4)   |
| N(1)  | 0.046(5)   | 0.038(4)   | 0.030(4)   | 0.001(3)    | -0.012(3)   | -0.004(3)   |
| N(2)  | 0.040(4)   | 0.044(4)   | 0.033(4)   | -0.003(3)   | -0.015(3)   | -0.003(3)   |
| N(3)  | 0.035(4)   | 0.044(4)   | 0.043(5)   | 0.004(3)    | -0.012(3)   | -0.005(3)   |
| N(4)  | 0.033(4)   | 0.045(4)   | 0.040(4)   | 0.004(3)    | -0.013(3)   | -0.005(3)   |
| C(a1) | 0.037(5)   | 0.054(6)   | 0.042(5)   | -0.004(4)   | -0.016(4)   | -0.007(4)   |
| C(a2) | 0.053(6)   | 0.038(5)   | 0.058(7)   | -0.010(5)   | -0.019(5)   | 0.002(4)    |
| C(a3) | 0.034(5)   | 0.048(5)   | 0.042(5)   | 0.007(4)    | -0.012(4)   | -0.003(4)   |
| C(a4) | 0.042(6)   | 0.051(6)   | 0.050(6)   | 0.010(5)    | -0.009(4)   | 0.006(5)    |
| C(a5) | 0.039(5)   | 0.042(5)   | 0.052(6)   | -0.002(4)   | -0.009(4)   | 0.004(4)    |
| C(a6) | 0.037(5)   | 0.047(6)   | 0.053(6)   | -0.003(5)   | -0.012(4)   | -0.003(4)   |
| C(a7) | 0.042(5)   | 0.057(6)   | 0.035(5)   | 0.000(4)    | -0.013(4)   | -0.004(4)   |
| C(a8) | 0.036(5)   | 0.066(7)   | 0.044(6)   | 0.010(5)    | -0.013(4)   | -0.006(5)   |
| C(b1) | 0.046(6)   | 0.044(5)   | 0.044(6)   | 0.003(4)    | -0.021(4)   | -0.001(4)   |
| C(b2) | 0.039(5)   | 0.039(5)   | 0.041(5)   | -0.002(4)   | -0.016(4)   | 0.006(4)    |
| C(b3) | 0.062(6)   | 0.048(6)   | 0.027(5)   | 0.002(4)    | -0.015(4)   | -0.005(5)   |
| C(b4) | 0.047(6)   | 0.048(6)   | 0.050(6)   | -0.003(5)   | -0.007(4)   | -0.003(5)   |
| C(b5) | 0.056(6)   | 0.052(6)   | 0.048(6)   | -0.010(5)   | -0.019(5)   | 0.002(5)    |
| C(b6) | 0.044(6)   | 0.058(6)   | 0.042(6)   | 0.003(5)    | -0.011(4)   | -0.008(5)   |
| C(b7) | 0.044(5)   | 0.055(6)   | 0.039(5)   | -0.007(4)   | -0.009(4)   | -0.009(4)   |
| C(b8) | 0.039(5)   | 0.052(6)   | 0.046(6)   | 0.010(5)    | -0.008(4)   | -0.011(4)   |
| C(m1) | 0.054(6)   | 0.042(5)   | 0.036(5)   | -0.002(4)   | -0.016(4)   | 0.000(4)    |
| C(m2) | 0.035(5)   | 0.049(6)   | 0.047(6)   | -0.009(4)   | -0.018(4)   | -0.005(4)   |
| C(m3) | 0.058(6)   | 0.049(6)   | 0.038(5)   | -0.012(4)   | -0.019(4)   | 0.001(5)    |
| C(m4) | 0.037(5)   | 0.058(6)   | 0.036(5)   | 0.007(4)    | -0.011(4)   | -0.013(4)   |
| C(11) | 0.051(6)   | 0.056(6)   | 0.052(6)   | 0.004(5)    | -0.023(5)   | -0.018(5)   |
| C(12) | 0.052(7)   | 0.081(9)   | 0.077(9)   | -0.007(7)   | -0.025(6)   | -0.013(6)   |
| C(21) | 0.056(6)   | 0.041(5)   | 0.051(6)   | -0.008(4)   | -0.023(5)   | 0.001(5)    |
| C(22) | 0.077(9)   | 0.069(8)   | 0.062(8)   | -0.007(6)   | -0.037(6)   | 0.000(6)    |
| C(31) | 0.064(7)   | 0.062(7)   | 0.043(6)   | 0.001(5)    | -0.021(5)   | -0.008(6)   |
| C(32) | 0.073(9)   | 0.077(9)   | 0.067(8)   | 0.020(7)    | -0.029(6)   | -0.020(7)   |
| C(41) | 0.068(8)   | 0.055(7)   | 0.047(6)   | -0.002(5)   | -0.009(5)   | -0.014(6)   |

**Table S5.** Continued

| atom   | $U_{11}$   | $U_{22}$   | $U_{33}$   | $U_{23}$    | $U_{13}$    | $U_{12}$    |
|--------|------------|------------|------------|-------------|-------------|-------------|
| C(42)  | 0.055(7)   | 0.062(7)   | 0.074(8)   | -0.013(6)   | -0.013(6)   | 0.005(6)    |
| C(51)  | 0.045(6)   | 0.046(6)   | 0.061(7)   | -0.011(5)   | -0.013(5)   | -0.004(4)   |
| C(52)  | 0.058(7)   | 0.046(6)   | 0.073(8)   | -0.006(5)   | -0.018(6)   | -0.015(5)   |
| C(61)  | 0.060(7)   | 0.060(7)   | 0.045(6)   | -0.009(5)   | -0.011(5)   | -0.006(5)   |
| C(62)  | 0.083(9)   | 0.070(8)   | 0.060(8)   | -0.014(6)   | -0.031(6)   | 0.003(7)    |
| C(71)  | 0.055(7)   | 0.074(8)   | 0.064(8)   | -0.003(6)   | 0.000(5)    | -0.019(6)   |
| C(72)  | 0.072(8)   | 0.066(8)   | 0.048(7)   | 0.002(5)    | -0.012(5)   | -0.005(6)   |
| C(81)  | 0.052(7)   | 0.069(7)   | 0.050(7)   | 0.002(5)    | -0.006(5)   | -0.017(6)   |
| C(82)  | 0.054(7)   | 0.082(9)   | 0.065(8)   | 0.021(7)    | -0.016(6)   | -0.019(6)   |
| Sb     | 0.0543(7)  | 0.0491(6)  | 0.0497(6)  | -0.0035(4)  | 0.0012(4)   | -0.0096(5)  |
| Cl(3)  | 0.0561(17) | 0.0584(17) | 0.0672(19) | -0.0072(13) | 0.0099(13)  | -0.0067(13) |
| Cl(4)  | 0.0585(17) | 0.0487(15) | 0.0647(18) | -0.0013(12) | -0.0012(13) | -0.0121(12) |
| Cl(5)  | 0.078(2)   | 0.0656(19) | 0.0633(19) | -0.0063(14) | -0.0175(15) | -0.0128(15) |
| C(1)   | 0.039(6)   | 0.056(7)   | 0.135(13)  | -0.025(8)   | -0.012(7)   | 0.003(5)    |
| Cl(11) | 0.077(2)   | 0.079(2)   | 0.074(2)   | -0.0157(17) | -0.0091(16) | 0.0043(17)  |
| Cl(12) | 0.072(2)   | 0.114(3)   | 0.089(3)   | -0.043(2)   | -0.0219(18) | 0.004(2)    |

<sup>a</sup>The estimated standard deviations of the least significant digits are given in parentheses. The anisotropic displacement factor exponent takes the form:  $-2 \pi [h^2 U_{11} + \dots + 2 h k a^* b^* U_{12}]$ .

**Table S6.** Hydrogen Atom Coordinates and Equivalent Isotropic Displacement Parameters ( $\text{\AA}^2$ ) for  $[\text{Fe}(\text{oxoOEC}^{•/2})(\text{Cl})]_2\text{SbCl}_6^a$

| atom  | $x$    | $y$     | $z$     | $U(\text{eq})$ |
|-------|--------|---------|---------|----------------|
| H(m1) | 0.8780 | 0.2382  | 0.3469  | 0.052          |
| H(m2) | 0.6484 | -0.0949 | 0.1659  | 0.050          |
| H(m3) | 0.9513 | 0.1087  | -0.1890 | 0.056          |
| H(m4) | 1.1538 | 0.4572  | -0.0093 | 0.053          |
| H(1a) | 1.1997 | 0.5472  | 0.1968  | 0.062          |
| H(1b) | 1.1843 | 0.5627  | 0.0979  | 0.062          |
| H(1c) | 1.3708 | 0.4160  | 0.1609  | 0.102          |
| H(1d) | 1.4089 | 0.5283  | 0.1048  | 0.102          |
| H(1e) | 1.3565 | 0.4340  | 0.0617  | 0.102          |
| H(2a) | 0.9896 | 0.3867  | 0.3711  | 0.057          |
| H(2b) | 1.1189 | 0.4533  | 0.3260  | 0.057          |
| H(2c) | 1.1195 | 0.2248  | 0.3674  | 0.099          |
| H(2d) | 1.1775 | 0.3071  | 0.4192  | 0.099          |
| H(2e) | 1.2490 | 0.2906  | 0.3212  | 0.099          |
| H(3a) | 0.8910 | -0.0322 | 0.3627  | 0.066          |
| H(3b) | 0.8744 | 0.0594  | 0.4267  | 0.066          |
| H(3c) | 0.7055 | -0.0313 | 0.5242  | 0.107          |
| H(3d) | 0.8268 | -0.1148 | 0.5013  | 0.107          |
| H(3e) | 0.7014 | -0.1173 | 0.4575  | 0.107          |
| H(4a) | 0.6607 | 0.1852  | 0.4365  | 0.069          |
| H(4b) | 0.5672 | 0.0842  | 0.4500  | 0.069          |
| H(4c) | 0.5813 | 0.2528  | 0.3099  | 0.096          |
| H(4d) | 0.4591 | 0.2364  | 0.3912  | 0.096          |
| H(4e) | 0.4898 | 0.1508  | 0.3213  | 0.096          |
| H(5a) | 0.6764 | -0.2237 | 0.0634  | 0.060          |
| H(5b) | 0.6746 | -0.2248 | -0.0370 | 0.060          |
| H(5c) | 0.4801 | -0.1114 | 0.0795  | 0.087          |
| H(5d) | 0.4565 | -0.2258 | 0.0504  | 0.087          |
| H(5e) | 0.4763 | -0.1225 | -0.0196 | 0.087          |
| H(6a) | 0.8246 | -0.1538 | -0.1695 | 0.066          |
| H(6b) | 0.8770 | -0.0397 | -0.2153 | 0.066          |
| H(6c) | 0.6062 | -0.0984 | -0.1697 | 0.102          |
| H(6d) | 0.6925 | -0.0761 | -0.2664 | 0.102          |
| H(6e) | 0.6520 | 0.0206  | -0.2072 | 0.102          |

**Table S6.** Continued

| atom  | <i>x</i> | <i>y</i> | <i>z</i> | <i>U</i> (eq) |
|-------|----------|----------|----------|---------------|
| H(7a) | 1.2196   | 0.2674   | -0.3016  | 0.079         |
| H(7b) | 1.0970   | 0.1896   | -0.2873  | 0.079         |
| H(7c) | 0.9599   | 0.3397   | -0.3180  | 0.094         |
| H(7d) | 1.0800   | 0.3232   | -0.3985  | 0.094         |
| H(7e) | 1.0861   | 0.4144   | -0.3365  | 0.094         |
| H(8a) | 1.1936   | 0.5164   | -0.1568  | 0.069         |
| H(8b) | 1.2149   | 0.4688   | -0.2484  | 0.069         |
| H(8c) | 1.3694   | 0.3904   | -0.1259  | 0.103         |
| H(8d) | 1.4152   | 0.4903   | -0.1963  | 0.103         |
| H(8e) | 1.4011   | 0.3751   | -0.2273  | 0.103         |
| H(1)  | 0.6211   | 0.1779   | 0.6228   | 0.092         |
| H(2)  | 0.7045   | 0.2848   | 0.5874   | 0.092         |

<sup>a</sup>*U*(eq) is defined as one third of the trace of the orthogonalized  $\mathbf{U}_{ij}$  tensor the estimated standard deviations of the least significant digits are given in parentheses.
